# Supplementary material for: Systematic review of health state utility values for economic evaluation of colorectal cancer
Source: Health Econ Rev. 2016 Aug 19;6:36. doi: 10.1186/s13561-016-0115-5 (PMC4991979; doi:10.1186/s13561-016-0115-5)
Supplement: Additional file 3: — Summary of mapping studies. (XLSX 9.22 KB) [file 13561_2016_115_MOESM3_ESM.xlsx]

## Sheet: Additional file 2. Mapping 
Additional file 3. Summary of mapping studies
Author (year)	Quality of life measures from	Quality of life measures to	Disease or patient group	Number of observations in estimation sample	Mapping model
Wong (2012a)	FACT-G FACT-C	SF-6D	LR & HR polyps, stage I II and III CRC patients in HK	n=553	OLS
Wong (2013a)	EORTC QLQ C-30/CR-29	SF-6D	CRC patients in Hong Kong	n=272	OLS
Wong (2014)	FACT-C	SF-6D			Used published mapping algorithm
Pickard (2012)	FACT-G	EQ-5D			Used published mapping algorithm
Kim (2012)	EORTC QLQ-C30	EQ-5D			OLS
Cheung (2012)	FCT-G	EQ-5D	cancer patients		CLAD OLS
Kim (2014)	SF-36	EQ-5D	general population including type 2 diabetes, stroke	n=2,211	OLS Two-part modeling multinomial logisticregression
Lee (2013)	SF-36	SF-6D	patients (18 year and older) undergoing elective colorectal resection	n=191
Yang (2014)	FACT-C	SF-6D			OLS (goodness-of-fit tested)
